# Supplementary material for: Sulfur poisoning mechanism of steam reforming catalysts: an X-ray absorption near edge structure (XANES) spectroscopic study
Source: Royal Society of Chemistry journal article supplement (doi:10.1039/b925910b), 2010-01-01
Supplement: b925910b.pdf [file b925910b.pdf]

**Sulfur poisoning mechanism of steam reforming catalysts: an x-ray  
absorption near edge structure (XANES) spectroscopic study**

*Yongsheng Chen\**, *Chao Xie*, *Yan Li*, *Chunshan Song\**, *Trudy B. Bolin*

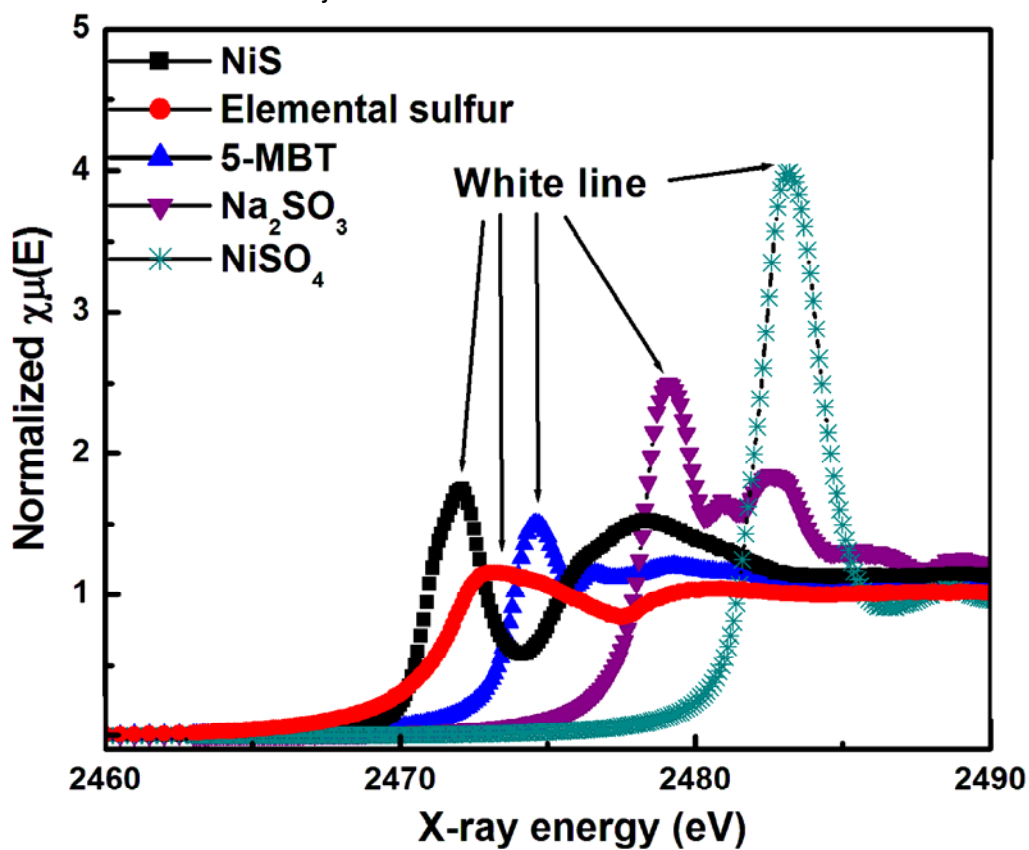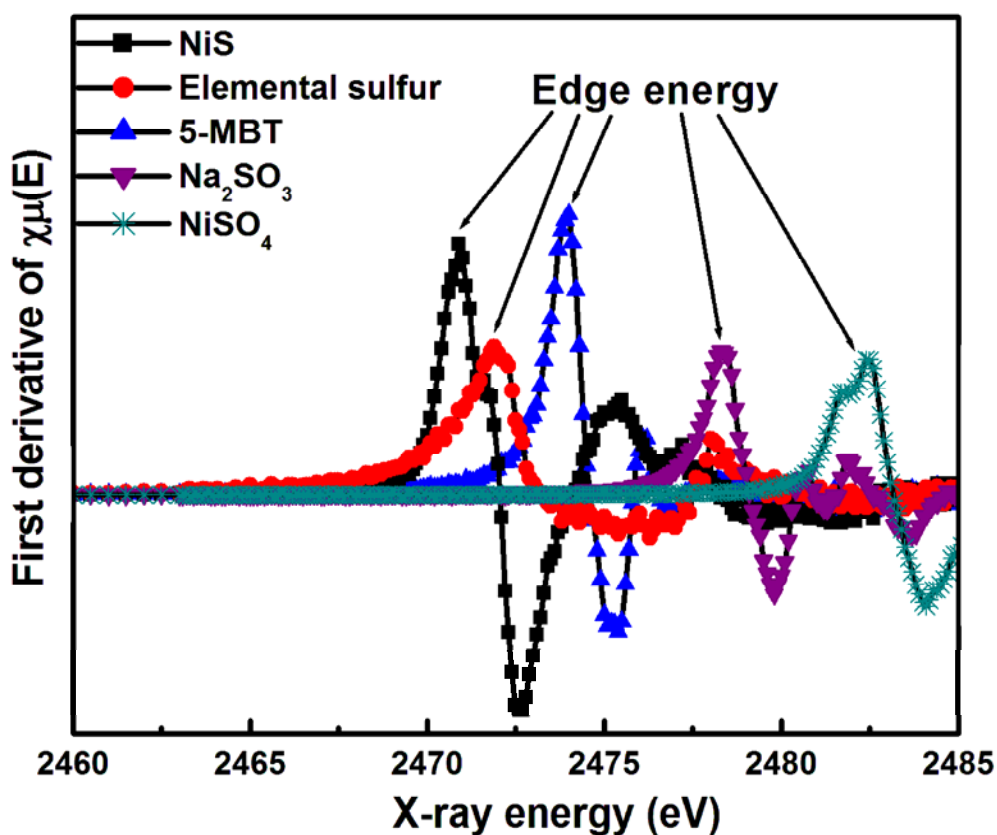

**Figure S1.** Sulfur standards. Top: absorption spectra (showing white line); Bottom: first derivative of the absorption spectra (showing edge energy).

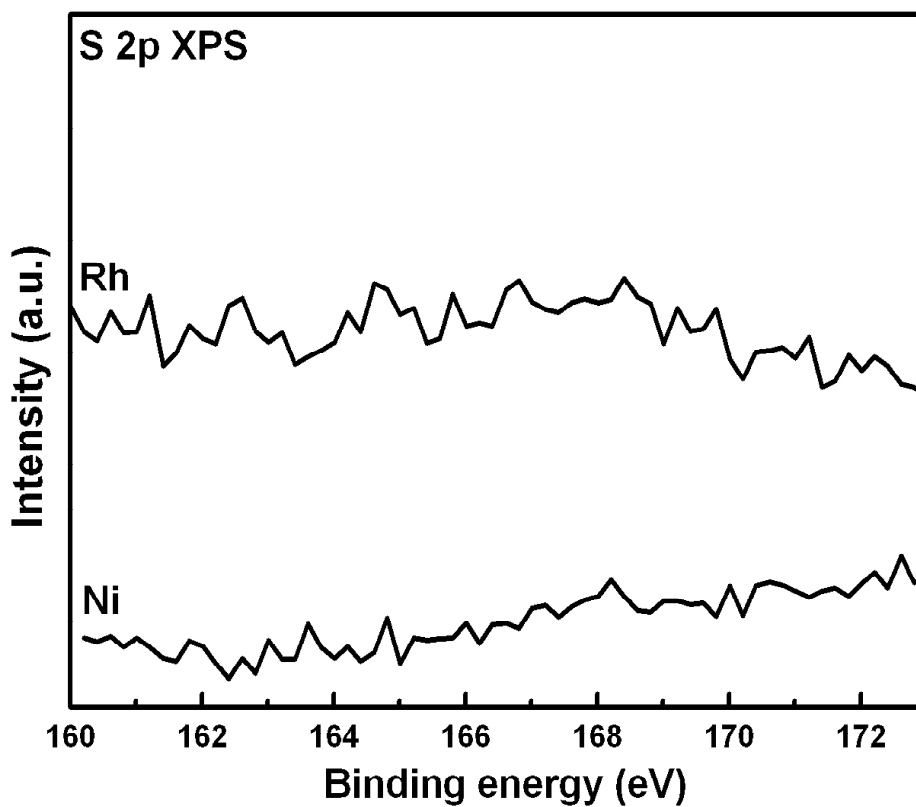

**Figure S2** S 2p XPS of the used 2wt%Rh/CeO<sub>2</sub>-Al<sub>2</sub>O<sub>3</sub> and 10wt%Ni/CeO<sub>2</sub>-Al<sub>2</sub>O<sub>3</sub> after steam reforming reaction with sulfur at 800 °C for 55 h. Sulfur peaks would appear somewhere between 161-169 eV depending on their oxidation states and chemical environment.

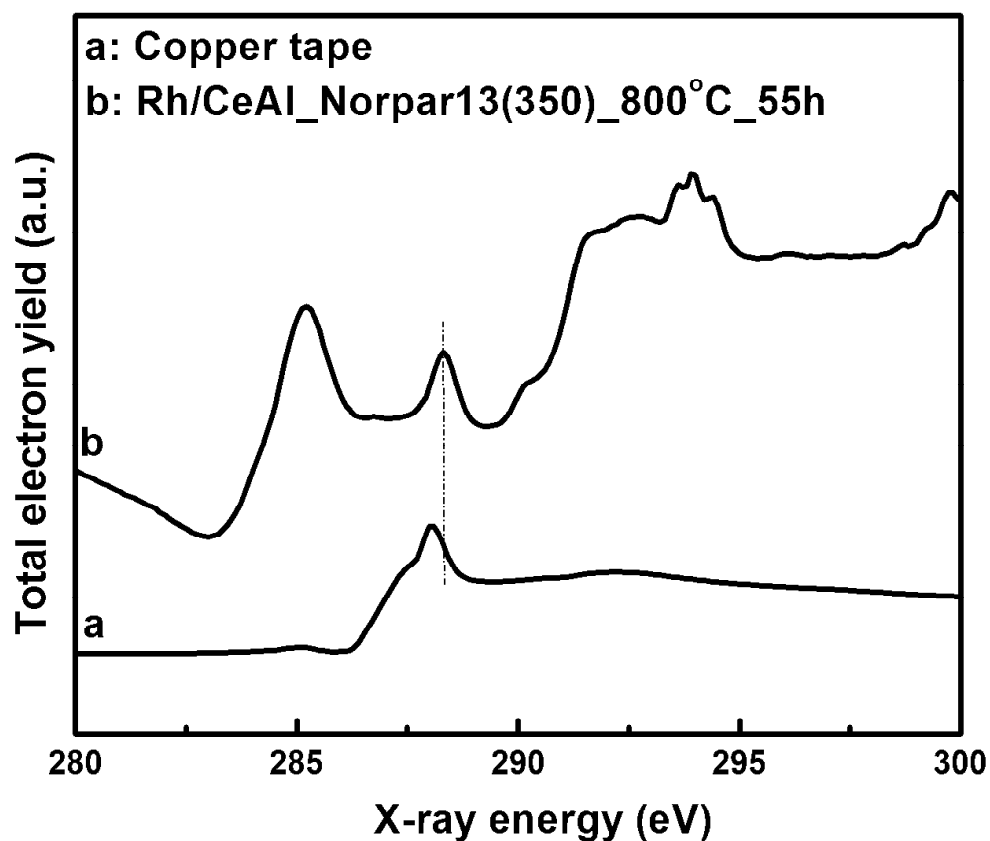

**Figure S3.** Carbon K-edge XANES spectrum of the copper tape used for sample preparation together with the spectrum of the Rh catalyst tested in the steam reforming reaction at 800 °C for 55 hours.

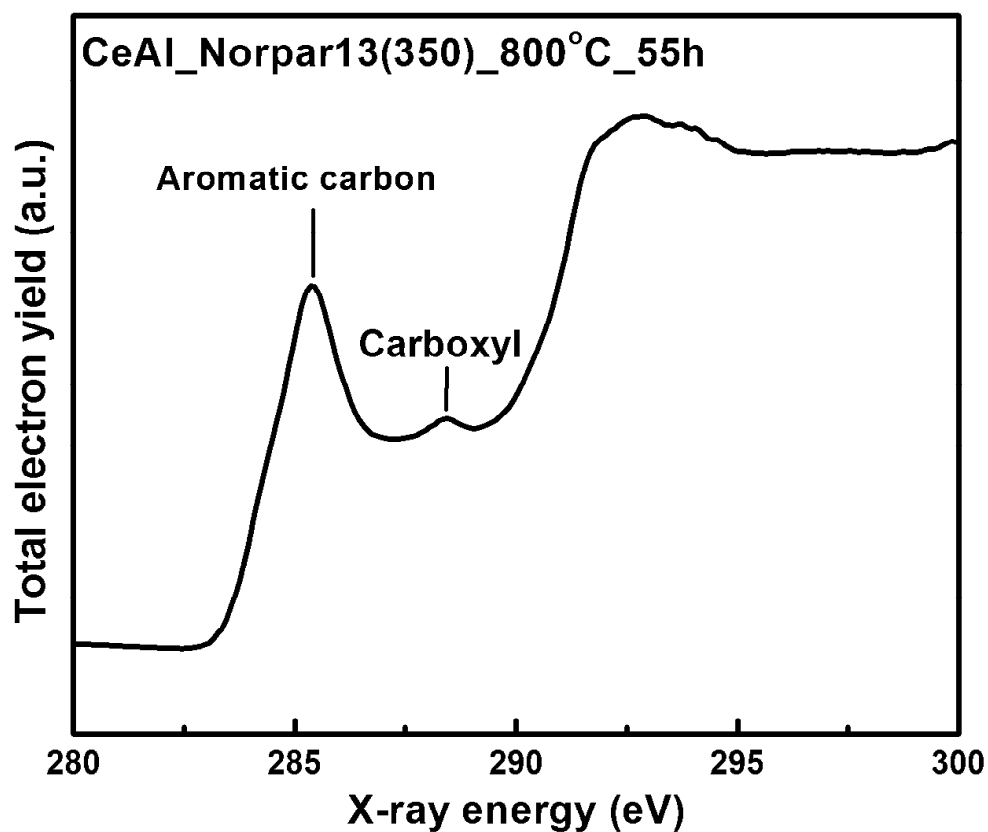

**Figure S4.** Carbon K-edge XANES spectrum of the used  $\text{CeO}_2\text{-Al}_2\text{O}_3$  support after steam reforming of Norpar13 with 350 ppmw sulfur at 800 °C for 55 h. The reaction conditions are exactly the same as those used for testing of the Ni and Rh catalysts.

**Table S1** Contents of metal sulfide, organic sulfide, and sulfate on the used 10wt%Ni/CeO<sub>2</sub>-Al<sub>2</sub>O<sub>3</sub> catalysts after steam reforming of Norpar13 with 350 ppmw sulfur at 800 °C for different reaction time

| Reaction time (h) | Metal sulfide (M-S)<br>mg/g'cat | Organic sulfide (C-S-C)<br>mg/g'cat | Sulfate (SO <sub>4</sub> <sup>2-</sup> )<br>mg/g'cat |
|-------------------|---------------------------------|-------------------------------------|------------------------------------------------------|
| 5                 | 0.85                            | 0                                   | 0.05                                                 |
| 15                | 0.69                            | 0.07                                | 0.17                                                 |
| 30                | 0.22                            | 0.44                                | 0.20                                                 |
| 55                | 0.54                            | 0.22                                | 0.20                                                 |

**Table S2** Molar ratio of S : C : Me (Me = Rh or Ni) for the used Rh and Ni catalysts after steam reforming of Norpar13 with 350 ppmw sulfur at 800 °C for 55 h

|                                                          | S    | C     | Rh    | Ni    |
|----------------------------------------------------------|------|-------|-------|-------|
| 2wt%Rh/CeO <sub>2</sub> -Al <sub>2</sub> O <sub>3</sub>  | 0.45 | 107.3 | 1     | ----- |
| 10wt%Ni/CeO <sub>2</sub> -Al <sub>2</sub> O <sub>3</sub> | 0.23 | 814.9 | ----- | 1     |
